# Supplementary material for: The introduction history of invasive garden ants in Europe: Integrating genetic, chemical and behavioural approaches
Source: PubMed Central journal article supplement (PMC2292682; doi:10.1186/1741-7007-6-11), 2008-02-26

## Additional files

### Additional file 1. Population differentiation based on genetic, chemical, behavioural and geographic pairwise distances.

a) Pairwise genetic distances ( $F_{ST}$ ) between sampled populations of *L.*

*neglectus*, using the six microsatellite loci (Table 2). Bold figures indicate

significance after multiple comparisons,  $P < 0.05$ . Order of populations after

geography as in Figure 4.

|            |       |        |          |          |          |          |          |          |          |       |            |       |       |          |  |
|------------|-------|--------|----------|----------|----------|----------|----------|----------|----------|-------|------------|-------|-------|----------|--|
| Jena       | —     |        |          |          |          |          |          |          |          |       |            |       |       |          |  |
| Warsaw     | 0.352 | —      |          |          |          |          |          |          |          |       |            |       |       |          |  |
| Edirne 2   | 0.373 | 0.396  | —        |          |          |          |          |          |          |       |            |       |       |          |  |
| Edirne 1   | 0.383 | 0.239  | 0.338    | —        |          |          |          |          |          |       |            |       |       |          |  |
| Edirne 3   | 0.431 | 0.334  | 0.425    | 0.021    | —        |          |          |          |          |       |            |       |       |          |  |
| Bayramiç   | 0.383 | 0.318  | 0.415    | 0.342    | 0.409    | —        |          |          |          |       |            |       |       |          |  |
| Debrecen   | 0.511 | 0.468  | 0.497    | 0.448    | 0.542    | 0.568    | —        |          |          |       |            |       |       |          |  |
| Budapest   | 0.431 | 0.352  | 0.390    | 0.348    | 0.445    | 0.474    | 0.019    | —        |          |       |            |       |       |          |  |
| Volterra   | 0.464 | 0.404  | 0.447    | 0.399    | 0.491    | 0.501    | 0.043    | 0.018    | —        |       |            |       |       |          |  |
| Seva       | 0.366 | 0.108  | 0.347    | 0.217    | 0.324    | 0.312    | 0.350    | 0.242    | 0.298    | —     |            |       |       |          |  |
| Bellaterra | 0.462 | 0.368  | 0.551    | 0.466    | 0.549    | 0.441    | 0.549    | 0.422    | 0.474    | 0.271 | —          |       |       |          |  |
| Ghent      | 0.261 | 0.167  | 0.284    | 0.220    | 0.307    | 0.328    | 0.335    | 0.217    | 0.246    | 0.139 | 0.373      | —     |       |          |  |
| Paris      | 0.212 | 0.165  | 0.228    | 0.176    | 0.249    | 0.284    | 0.321    | 0.220    | 0.258    | 0.156 | 0.371      | 0.031 | —     |          |  |
| Toulouse   | 0.261 | 0.216  | 0.322    | 0.267    | 0.349    | 0.361    | 0.363    | 0.235    | 0.270    | 0.189 | 0.374      | 0.033 | 0.044 | —        |  |
|            | Jena  | Warsaw | Edirne 2 | Edirne 1 | Edirne 3 | Bayramiç | Debrecen | Budapest | Volterra | Seva  | Bellaterra | Ghent | Paris | Toulouse |  |

b) Pairwise chemical (Mahalanobis) distances based on discriminant analysis

of the cuticular hydrocarbon profiles between the sampled *L. neglectus*

populations (Figure 3, Additional File 2).

|            |         |         |          |          |          |          |          |          |          |        |            |        |        |          |  |
|------------|---------|---------|----------|----------|----------|----------|----------|----------|----------|--------|------------|--------|--------|----------|--|
| Jena       | —       |         |          |          |          |          |          |          |          |        |            |        |        |          |  |
| Warsaw     | 173.595 | —       |          |          |          |          |          |          |          |        |            |        |        |          |  |
| Edirne 2   | 33.979  | 92.420  | —        |          |          |          |          |          |          |        |            |        |        |          |  |
| Edirne 1   | 9.552   | 140.613 | 18.201   | —        |          |          |          |          |          |        |            |        |        |          |  |
| Edirne 3   | 18.581  | 149.683 | 17.890   | 8.220    | —        |          |          |          |          |        |            |        |        |          |  |
| Bayramiç   | 35.793  | 223.794 | 56.509   | 28.214   | 15.715   | —        |          |          |          |        |            |        |        |          |  |
| Debrecen   | 21.854  | 100.649 | 9.717    | 16.584   | 29.181   | 63.677   | —        |          |          |        |            |        |        |          |  |
| Budapest   | 34.678  | 140.078 | 28.834   | 25.275   | 50.795   | 88.598   | 13.354   | —        |          |        |            |        |        |          |  |
| Volterra   | 25.644  | 155.667 | 56.398   | 27.440   | 49.608   | 68.254   | 29.940   | 46.767   | —        |        |            |        |        |          |  |
| Seva       | 29.804  | 146.094 | 30.896   | 21.646   | 31.089   | 46.918   | 17.047   | 29.688   | 21.712   | —      |            |        |        |          |  |
| Bellaterra | 20.631  | 103.107 | 20.772   | 17.348   | 36.459   | 71.430   | 3.606    | 14.575   | 16.121   | 14.543 | —          |        |        |          |  |
| Ghent      | 11.982  | 235.529 | 65.184   | 23.861   | 30.436   | 28.437   | 47.719   | 59.601   | 30.338   | 28.410 | 41.879     | —      |        |          |  |
| Paris      | 25.614  | 111.832 | 29.515   | 29.610   | 47.773   | 76.471   | 10.172   | 18.716   | 45.017   | 34.589 | 13.342     | 53.433 | —      |          |  |
| Toulouse   | 26.826  | 111.445 | 28.222   | 23.418   | 45.113   | 81.553   | 7.377    | 12.738   | 18.391   | 13.060 | 1.783      | 44.508 | 16.841 | —        |  |
|            | Jena    | Warsaw  | Edirne 2 | Edirne 1 | Edirne 3 | Bayramiç | Debrecen | Budapest | Volterra | Seva   | Bellaterra | Ghent  | Paris  | Toulouse |  |

c) Pairwise behavioural distance (aggression probabilities) between the sampled *L. neglectus* populations (Figure 4).

|            |      |        |          |          |          |          |          |          |          |      |            |       |       |          |
|------------|------|--------|----------|----------|----------|----------|----------|----------|----------|------|------------|-------|-------|----------|
| Jena       | 0.00 |        |          |          |          |          |          |          |          |      |            |       |       |          |
| Warsaw     | 1.00 | 0.00   |          |          |          |          |          |          |          |      |            |       |       |          |
| Edirne 2   | 1.00 | 1.00   | 0.00     |          |          |          |          |          |          |      |            |       |       |          |
| Edirne 1   | 0.60 | 1.00   | 0.55     | 0.00     |          |          |          |          |          |      |            |       |       |          |
| Edirne 3   | 0.60 | 1.00   | 0.55     | 0.00     | 0.00     |          |          |          |          |      |            |       |       |          |
| Bayramiç   | 1.00 | 1.00   | 1.00     | 0.33     | 0.33     | 0.00     |          |          |          |      |            |       |       |          |
| Debrecen   | 0.80 | 0.80   | 0.67     | 0.58     | 0.58     | 0.67     | 0.00     |          |          |      |            |       |       |          |
| Budapest   | 0.60 | 0.80   | 1.00     | 0.58     | 0.58     | 0.33     | 0.30     | 0.00     |          |      |            |       |       |          |
| Volterra   | 0.00 | 0.78   | 1.00     | 0.70     | 0.70     | 0.33     | 0.20     | 0.20     | 0.00     |      |            |       |       |          |
| Seva       | 0.50 | 0.40   | 1.00     | 0.60     | 0.60     | 0.67     | 0.11     | 0.00     | 0.00     | 0.00 |            |       |       |          |
| Bellaterra | 0.40 | 0.70   | 0.67     | 0.64     | 0.64     | 0.00     | 0.70     | 0.80     | 0.30     | 0.70 | 0.00       |       |       |          |
| Ghent      | 0.44 | 0.89   | 1.00     | 0.60     | 0.60     | 1.00     | 0.22     | 0.00     | 0.25     | 0.00 | 0.44       | 0.00  |       |          |
| Paris      | 0.80 | 0.67   | 0.67     | 0.73     | 0.73     | 0.67     | 0.30     | 0.00     | 0.20     | 0.00 | 0.40       | 0.11  | 0.00  |          |
| Toulouse   | 0.00 | 0.60   | 1.00     | 0.60     | 0.60     | 0.67     | 0.30     | 0.20     | 0.00     | 0.00 | 0.44       | 0.00  | 0.00  | 0.00     |
|            | Jena | Warsaw | Edirne 2 | Edirne 1 | Edirne 3 | Bayramiç | Debrecen | Budapest | Volterra | Seva | Bellaterra | Ghent | Paris | Toulouse |

d) Pairwise geographic distances (in km) between the study populations of *L. neglectus* (Figure 1).

|            |      |        |          |          |          |          |          |          |          |      |            |       |       |          |
|------------|------|--------|----------|----------|----------|----------|----------|----------|----------|------|------------|-------|-------|----------|
| Jena       | —    |        |          |          |          |          |          |          |          |      |            |       |       |          |
| Warsaw     | 825  | —      |          |          |          |          |          |          |          |      |            |       |       |          |
| Edirne 2   | 1648 | 1267   | —        |          |          |          |          |          |          |      |            |       |       |          |
| Edirne 1   | 1651 | 1270   | 2        | —        |          |          |          |          |          |      |            |       |       |          |
| Edirne 3   | 1651 | 1270   | 3        | 1        | —        |          |          |          |          |      |            |       |       |          |
| Bayramiç   | 1788 | 1463   | 208      | 206      | 206      | —        |          |          |          |      |            |       |       |          |
| Debrecen   | 943  | 525    | 778      | 780      | 781      | 960      | —        |          |          |      |            |       |       |          |
| Budapest   | 748  | 560    | 912      | 914      | 915      | 1071     | 224      | —        |          |      |            |       |       |          |
| Volterra   | 839  | 1315   | 1364     | 1366     | 1367     | 1412     | 1034     | 834      | —        |      |            |       |       |          |
| Seva       | 1289 | 1984   | 2089     | 2091     | 2091     | 2105     | 1781     | 1570     | 759      | —    |            |       |       |          |
| Bellaterra | 1328 | 2019   | 2104     | 2106     | 2107     | 2117     | 1809     | 1599     | 783      | 41   | —          |       |       |          |
| Ghent      | 677  | 1494   | 2224     | 2226     | 2227     | 2332     | 1589     | 1376     | 1048     | 1030 | 1069       | —     |       |          |
| Paris      | 850  | 1672   | 2242     | 2244     | 2245     | 2327     | 1683     | 1460     | 955      | 763  | 801        | 293   | —     |          |
| Toulouse   | 1193 | 1938   | 2169     | 2171     | 2172     | 2203     | 1790     | 1570     | 809      | 206  | 238        | 851   | 572   | —        |
|            | Jena | Warsaw | Edirne 2 | Edirne 1 | Edirne 3 | Bayramiç | Debrecen | Budapest | Volterra | Seva | Bellaterra | Ghent | Paris | Toulouse |

e) Partial correlations between genetic, chemical, behavioural and geographic distance between the *L. neglectus* populations. Correlation coefficients ( $r_{x,y,z}$ ) are given for each plot. Mantel tests showed that correlation coefficients were only significant for behavioural distance vs. geographic, genetic and chemical distance.

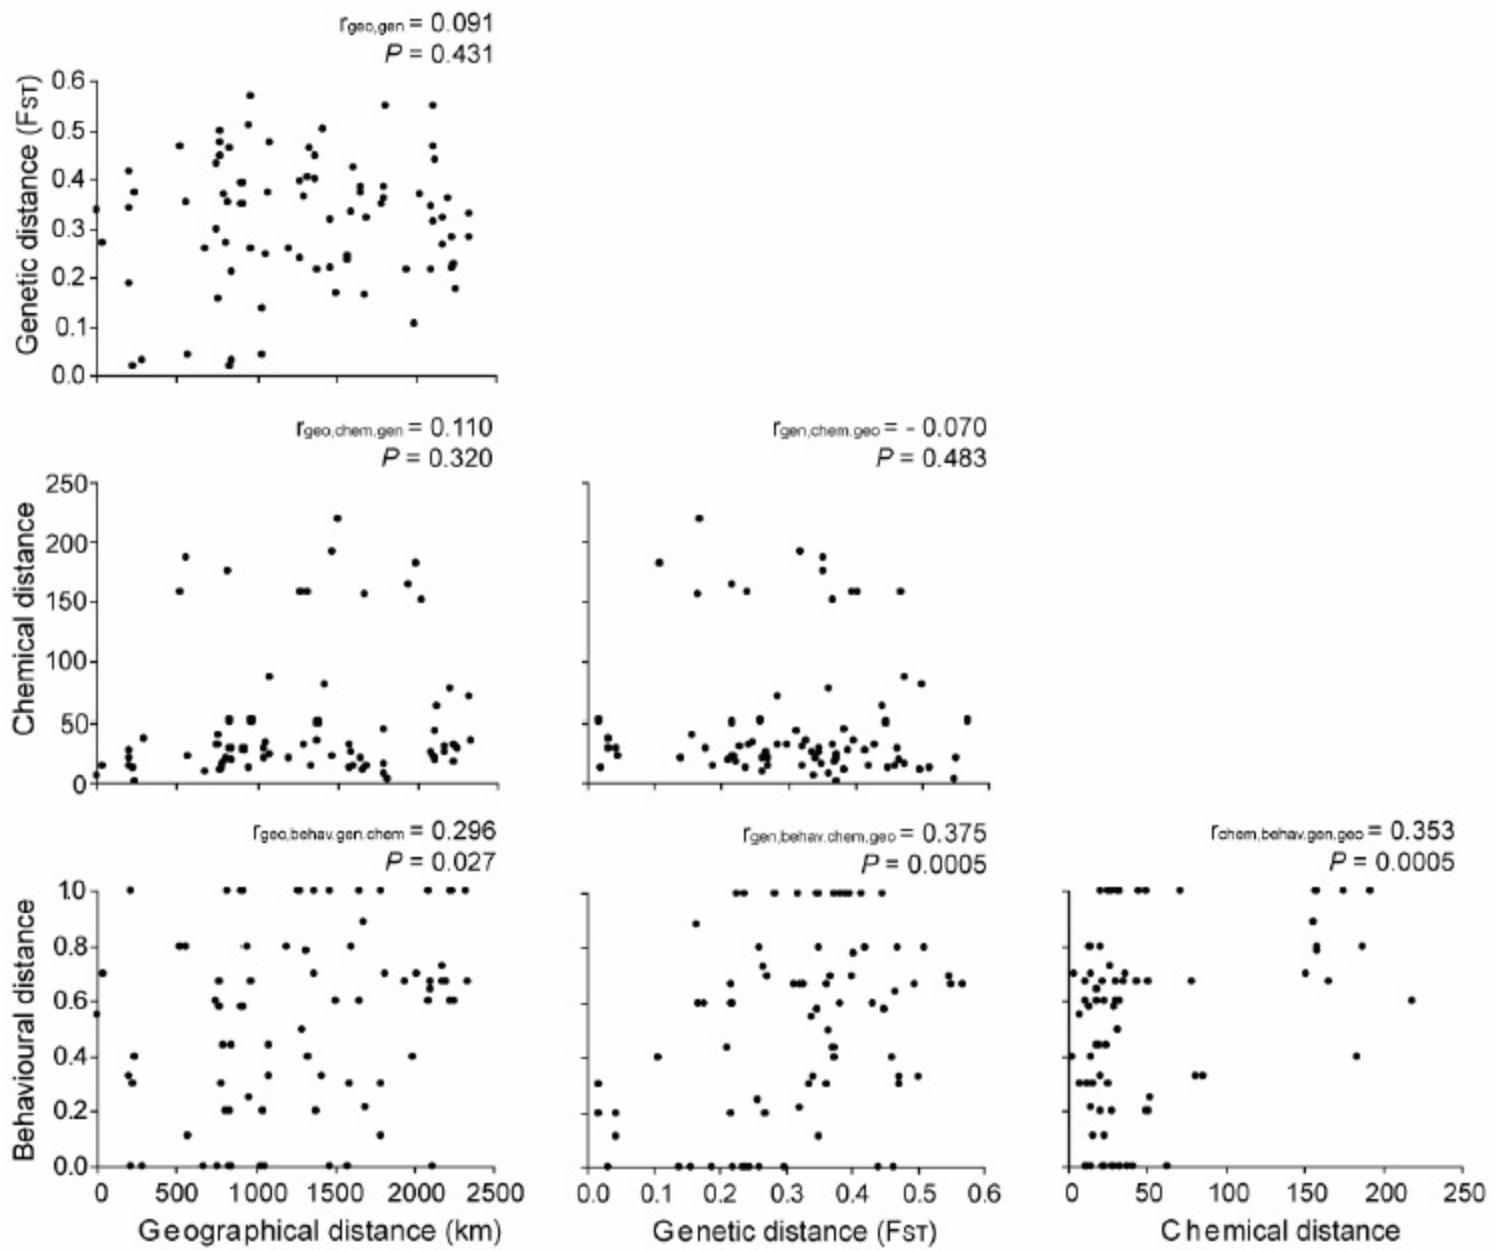

Supplement: 1741-7007-6-11-S1.pdf [file 1741-7007-6-11-S1.pdf]
