# Supplementary material for: The introduction history of invasive garden ants in Europe: Integrating genetic, chemical and behavioural approaches
Source: PubMed Central journal article supplement (PMC2292682; doi:10.1186/1741-7007-6-11), 2008-02-26
Supplement: 1741-7007-6-11-S2.pdf [file 1741-7007-6-11-S2.pdf]

## Additional file 2. Cuticular hydrocarbon compounds of *Lasius neglectus*.

Peak number (see profile Figure 3a), short and full name of the 24 cuticular hydrocarbon compounds in the profile of *L. neglectus*.

| Peak number | Short compound name                   | Full compound name                                                |
|-------------|---------------------------------------|-------------------------------------------------------------------|
| 1           | 11C31:1                               | hentriacont-11-ene                                                |
| 2           | C31                                   | hentriacontane                                                    |
| 3           | 13MeC31                               | 13Methylhentriacontane                                            |
| 4           | 3MeC31                                | 3Methylhentriacontane                                             |
| 5           | C33:2                                 | trtriacontadiene                                                  |
| 6           | C33:2                                 | trtriacontadiene                                                  |
| 7           | C33:2                                 | trtriacontadiene                                                  |
| 8           | 12C33:1 + 13C33:1                     | trtriacont-12-ene + trtriacont-13-ene                             |
| 9           | 10C33:1 + 11C33:1                     | trtriacont-10-ene + trtriacont-11-ene                             |
| 10          | 7C33:1                                | trtriacont-7-ene                                                  |
| 11          | 13Me21C33:1 + 13Me23C33:1             | 13Methyltrtriacont-21-ene + 13Methyltrtriacont-23-ene             |
| 12          | 13MeC33 + 15MeC33                     | 13Methyltrtriacontane + 15Methyltrtriacontane                     |
| 13          | 3Me21C33:1                            | 3Methyltrtriacont-21-ene                                          |
| 14          | 3Me23C33:1                            | 3Methyltrtriacont-23-ene                                          |
| 15          | 10,23diMeC33                          | 10,23Dimethyltrtriacontane                                        |
| 16          | 3MeC33 + 5,15diMeC33                  | 3Methyltrtriacontane + 5,15Dimethyltrtriacontane                  |
| 17          | 12,14,22Me21C34:1 + 12,14,22Me23C34:1 | 12,14,22Methyltetracont-21-ene + 12,14,22Methyltetracont-23-ene   |
| 18          | C35:2                                 | pentatriacontadiene                                               |
| 19          | C35:2                                 | pentatriacontadiene                                               |
| 20          | C35:2                                 | pentatriacontadiene                                               |
| 21          | 21C35:1                               | pentatriacont-21-ene                                              |
| 22          | 23C35:1                               | pentatriacont-23-ene                                              |
| 23          | 13,15Me21C35:1 + 13,15Me23C35:1       | 13,15Methylpentatriacont-21-ene + 13,15Methylpentatriacont-23-ene |
| 24          | 13MeC35 + 15MeC35                     | 13Methylpentatriacontane + 15Methylpentatriacontane               |
